# Supplementary material for: Type XXII Collagen Complements Fibrillar Collagens in the Serological Assessment of Tumor Fibrosis and the Outcome in Pancreatic Cancer
Source: MDPI journal article supplement (doi:10.3390/cells11233763), 2022-11-24
Supplement: s1 [file s1]

Article

# Type XXII Collagen Complements Fibrillar Collagens in the Serological Assessment of Tumor Fibrosis and the Outcome in Pancreatic Cancer

Emilie A. Madsen <sup>1,2,\*</sup>, Jeppe Thorlacius-Ussing <sup>1</sup>, Neel I. Nissen <sup>1</sup>, Christina Jensen <sup>1</sup>, Inna M. Chen <sup>3</sup>, Julia S. Johansen <sup>3,4,5</sup>, Hadi M. H. Diab <sup>6</sup>, Lars N. Jørgensen <sup>5,6</sup>, Carsten P. Hansen <sup>7</sup>, Morten A. Karsdal <sup>1</sup> and Nicholas Willumsen <sup>1</sup>

<sup>1</sup> Biomarkers and Research, Nordic Bioscience A/S, Herlev Hovedgade 207, 2730 Herlev, Denmark

<sup>2</sup> Department of Biomedical Sciences, University of Copenhagen, 2200 Copenhagen, Denmark

<sup>3</sup> Department of Oncology, Copenhagen University Hospital—Herlev and Gentofte, 2730 Herlev, Denmark

<sup>4</sup> Department of Medicine, Copenhagen University Hospital—Herlev and Gentofte, 2730 Herlev, Denmark

<sup>5</sup> Department of Clinical Medicine, Faculty of Health and Medical Sciences, University of Copenhagen, 2200 Copenhagen, Denmark

<sup>6</sup> Digestive Disease Center, Bispebjerg Hospital, University of Copenhagen, 2400 Copenhagen, Denmark

<sup>7</sup> Department of Surgery, Rigshospitalet, University of Copenhagen, 2100 Copenhagen, Denmark

\* Correspondence: eam@nordicbio.com; Tel.: +45-44525252

## Supplementary Data

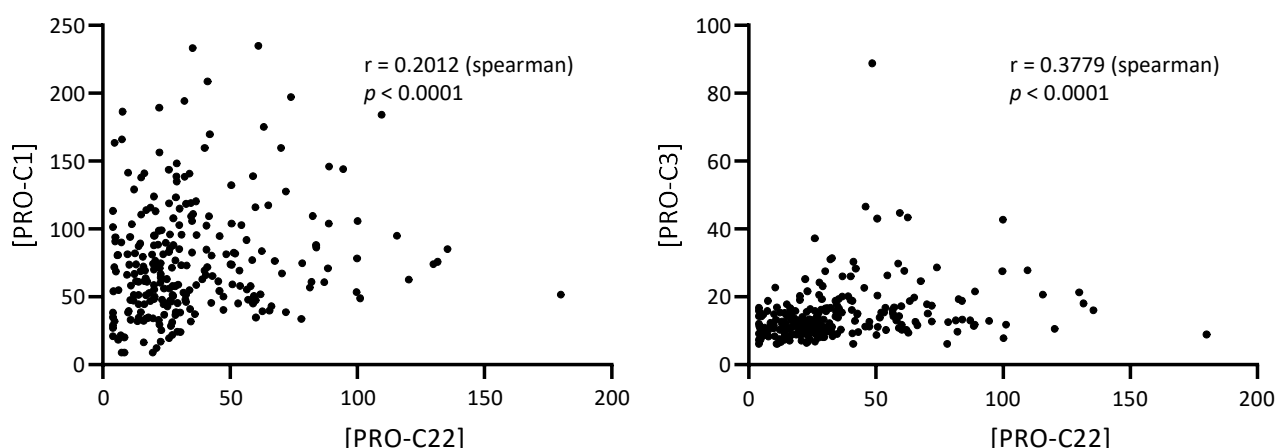

**Supplementary Figure S1.** Biomarker correlations. Correlation between PRO-C22 and PRO-C1 (left) and PRO-C3 (right). Brackets indicate the concentration of the given biomarker,  $r$  is the calculated spearman's correlation coefficient,  $p < 0.05$  is considered significant.

**Supplementary Table S1.** Ability of PRO-C22 to separate patients with pancreatic ductal adenocarcinoma (PDAC) from healthy subjects.

| PRO-C22     | AUROC<br>(95% CI)      | Sensitivity %<br>(95% CI) | Specificity %<br>(95% CI) |
|-------------|------------------------|---------------------------|---------------------------|
| PDAC (n=34) | 0.87<br>(0.75 to 0.95) | 79<br>(62.1 - 91.3)       | 80<br>(56.3 - 94.3)       |

**Supplementary Table S2.** Ability of PRO-C3 to separate patients with pancreatic ductal adenocarci-noma (PDAC) from healthy subjects.

| PRO-C3      | AUROC<br>(95% CI)      | Sensitivity %<br>(95% CI) | Specificity %<br>(95% CI) |
|-------------|------------------------|---------------------------|---------------------------|
| PDAC (n=34) | 0.85<br>(0.73 to 0.94) | 68<br>(49.5 - 82.6)       | 90<br>(68.3 - 98.8)       |
